# Supplementary material
Source: MDPI journal article supplement (https://www.mdpi.com/2813-0464/2/4/33)
Supplement: s1 [file s1]

Archive with 1 entries (1 files):
- applbiosci-2524167-supplementary.pdf
